# Supplementary material for: Synergic effect of a MoS2–V2O5 heterostructure as an advanced catalyst for photocatalytic degradation of methylene blue
Source: Royal Society of Chemistry journal article supplement (doi:10.1039/d4nj04295f), 2024-12-12
Supplement: d4nj04295f1.pdf [file d4nj04295f1.pdf]

## Supplementary Information

### Synergistic effect of MoS<sub>2</sub>-V<sub>2</sub>O<sub>5</sub> hetero-structure as advanced catalyst for photocatalytic degradation of methylene blue

Muhammad Tariq Nadeem <sup>a, b</sup>, Rimsha Aqeel <sup>c</sup>, Amina Zafar <sup>d</sup>, Amjad Nisar <sup>a</sup>, Iftikhar Ahmad\* <sup>b</sup> and Mashkoor Ahmad\*<sup>a</sup>

<sup>a</sup>Nanomaterials Research Group, Physics Division, PINSTECH, Islamabad 44000, Pakistan.

<sup>b</sup>Department of Physics, The University of Lahore, Lahore 54590, Pakistan.

<sup>c</sup>Department of Chemistry, Govt. College University Faisalabad.

<sup>d</sup>Central Analytical Facility Division, PINSTECH, Islamabad 44000, Pakistan.

Correspondence:

[mashkoorahmad2003@yahoo.com](mailto:mashkoorahmad2003@yahoo.com) (Mashkoor Ahmad)

[Muhammad.iftikhar@phys.uol.edu.pk](mailto:Muhammad.iftikhar@phys.uol.edu.pk)

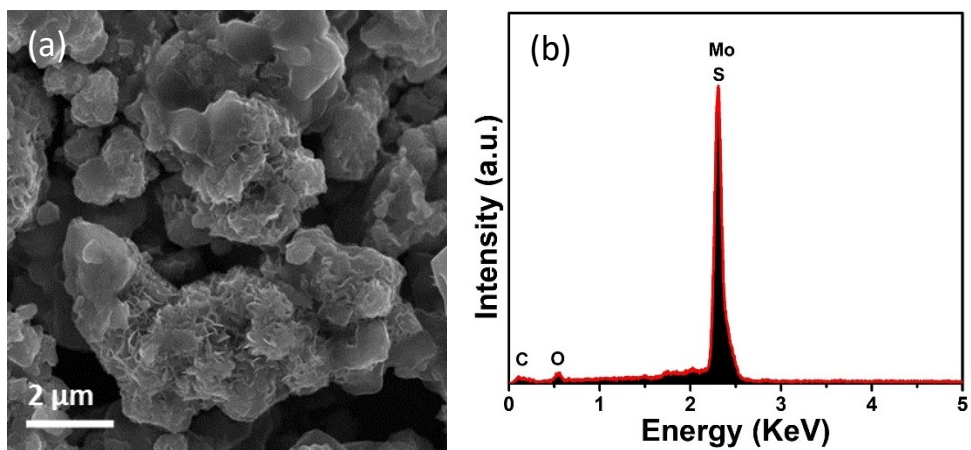

Fig. S1 (a) SEM image of MoS<sub>2</sub> (b) Corresponding EDX.

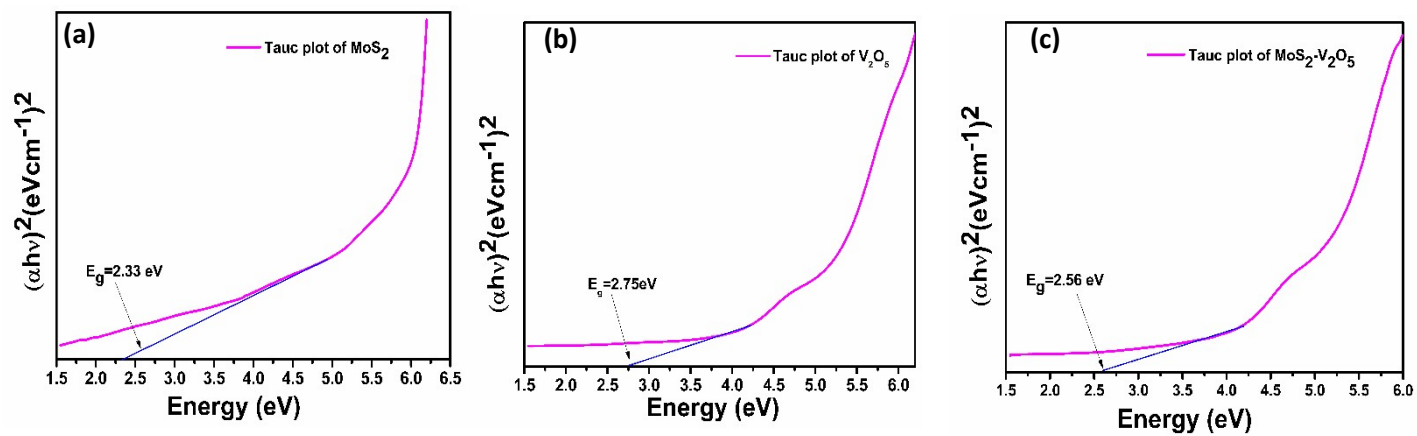

Fig. S2 Band gap analysis of (a) MoS<sub>2</sub> (b) V<sub>2</sub>O<sub>5</sub> and (c) MoS<sub>2</sub>-V<sub>2</sub>O<sub>5</sub> structures.

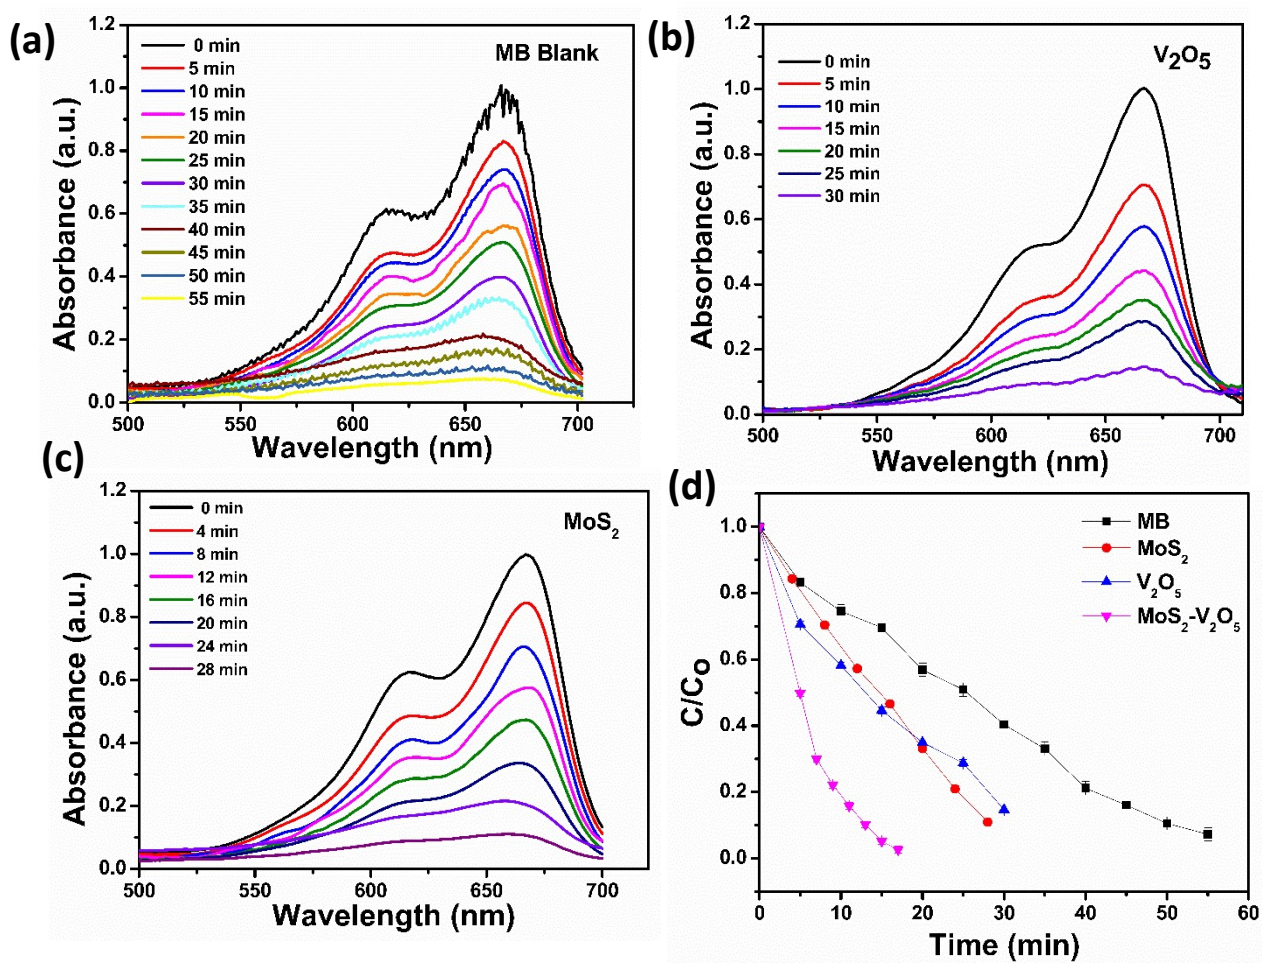

**Fig. S3.** (a-d) Time dependent UV-Vis absorbance spectra of MB in aqueous solutions in the presence of (a) No catalyst (b) V<sub>2</sub>O<sub>5</sub> (c) MoS<sub>2</sub> under UV light irradiation (d) Change in degradation efficiency of MB in the presence of MoS<sub>2</sub>, V<sub>2</sub>O<sub>5</sub>, MoS<sub>2</sub>-V<sub>2</sub>O<sub>5</sub> and without any catalyst.

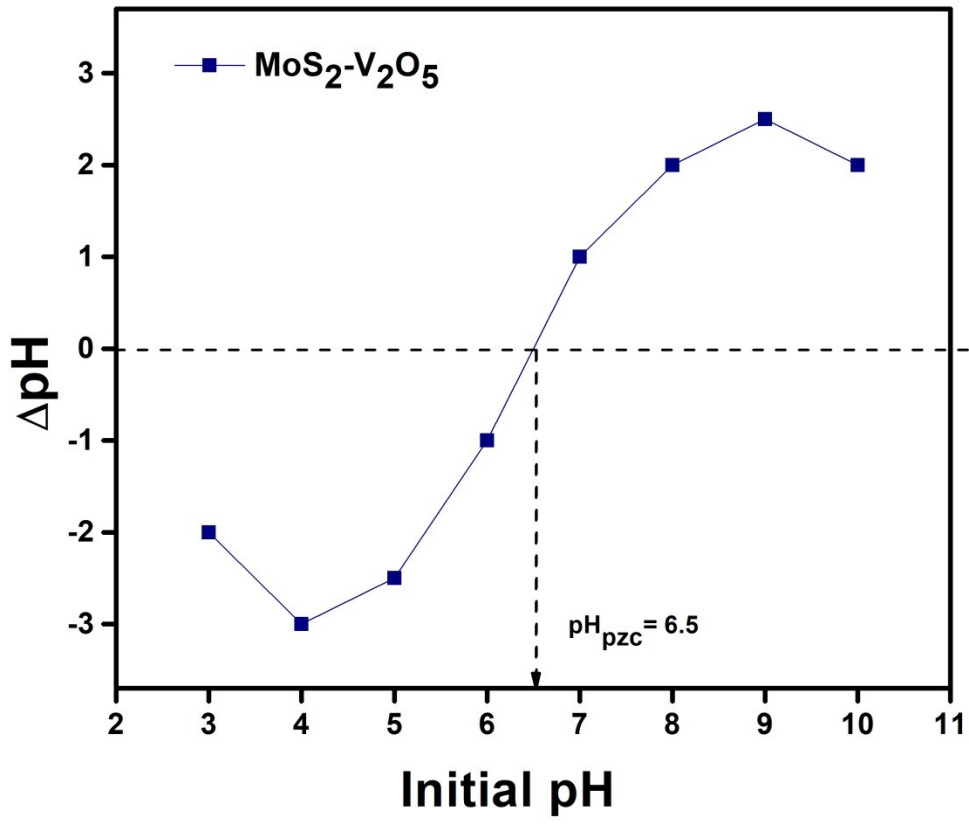

Fig. S4.  $\text{pH}_{\text{pzc}}$  calculation of  $\text{MoS}_2\text{-V}_2\text{O}_5$

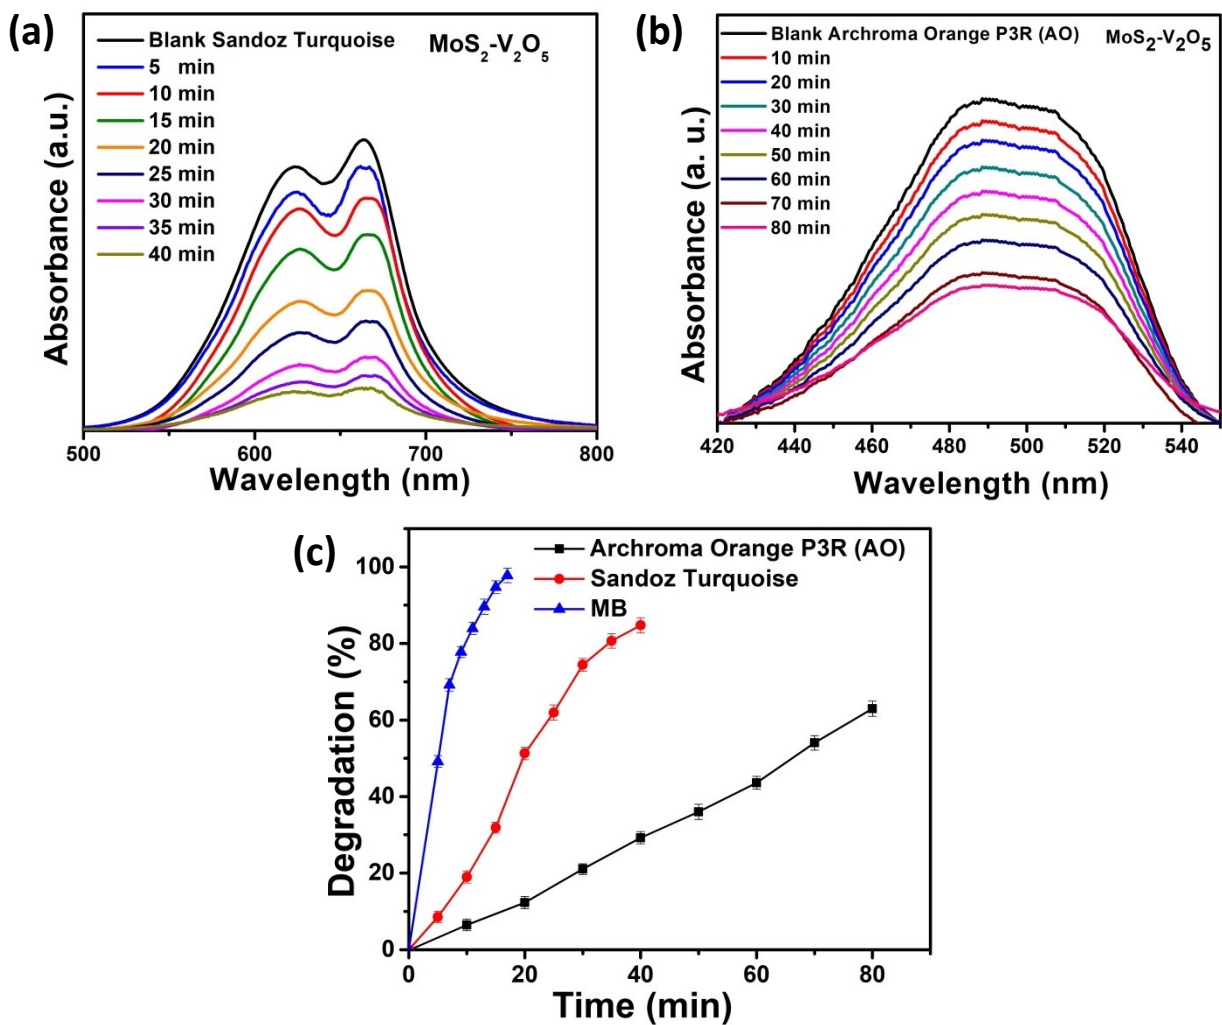

**Fig. S5.** Time dependent UV-Vis absorbance spectra of in aqueous solutions in the presence of (a) sandoze Turquoise (b) Archroma Orange P3R (c) The comparison of photocatalytic activity of the catalyst in lab scale dye (MB) and real time local industrial dyes, AO and ST.

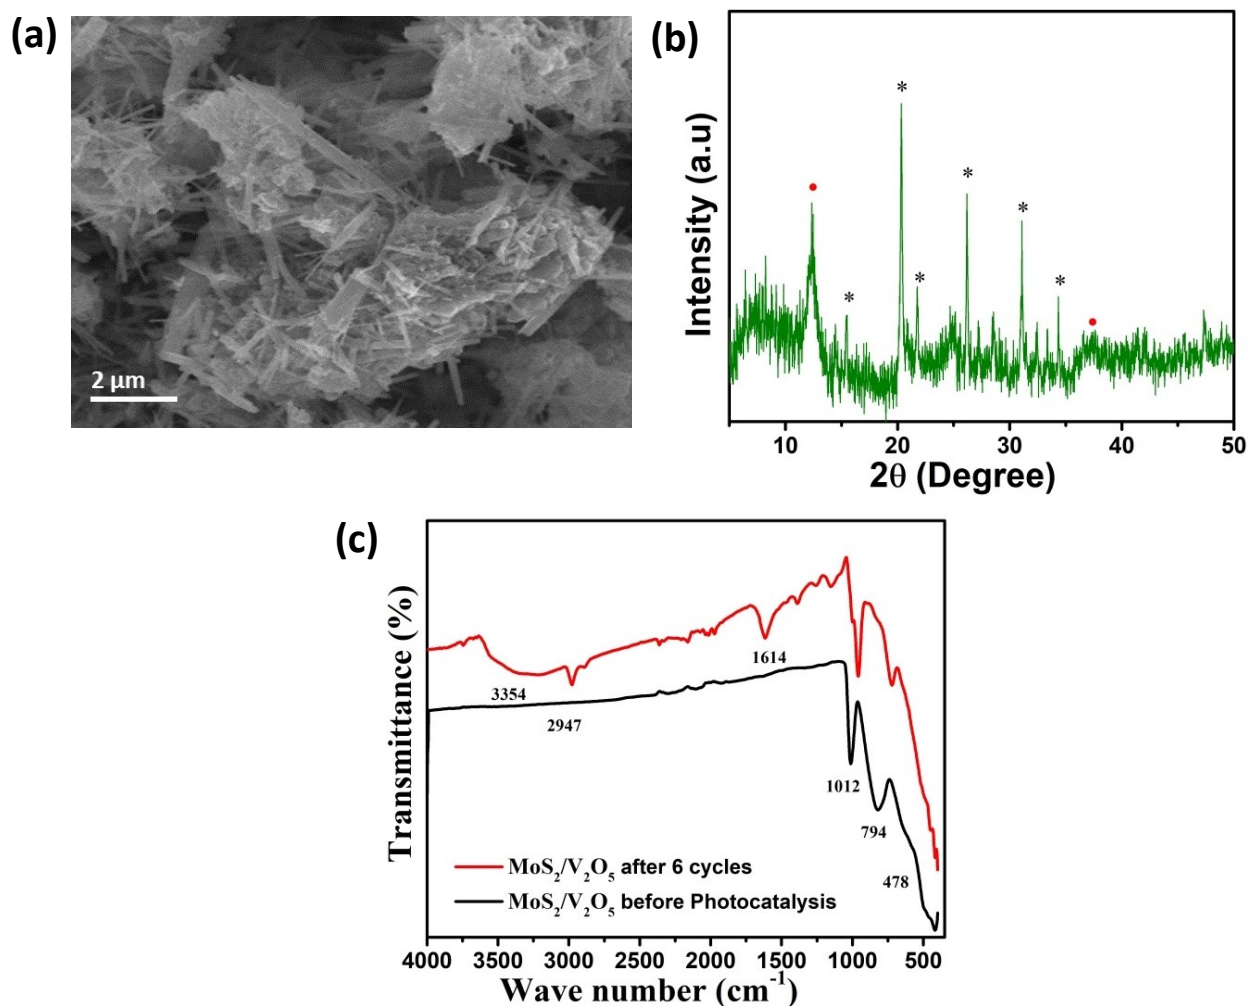

**Fig.S6** Structural stability of  $\text{MoS}_2\text{-V}_2\text{O}_5$  catalyst after 6 cycles of operation (a) SEM image (b) XRD and (c) FTIR
